# Supplementary material
Source: publisher figshare collection journal article supplement (https://acs.figshare.com/ndownloader/files/24758020)
Supplement: Supplementary file 1 [file 24758020]

## Supporting Information

### ***In-Situ* Formed Bimetallic Carbide Ni<sub>6</sub>Mo<sub>6</sub>C Nanodots and NiMoO<sub>x</sub> Nanosheet Arrays Hybrids Anchored on Carbon Cloth: Efficient and Flexible Self-supported Catalysts for Hydrogen Evolution**

*Xiaozhong Zheng, Yuzhuo Chen, Xiaobing Bao, Shanjun Mao, Ruxue Fan, and Yong Wang\**

Advanced Materials and Catalysis Group, Institute of Catalysis, Department of Chemistry, 310028, Zhejiang University, Hangzhou, P. R. China.

E-mail: [chemwy@zju.edu.cn](mailto:chemwy@zju.edu.cn)

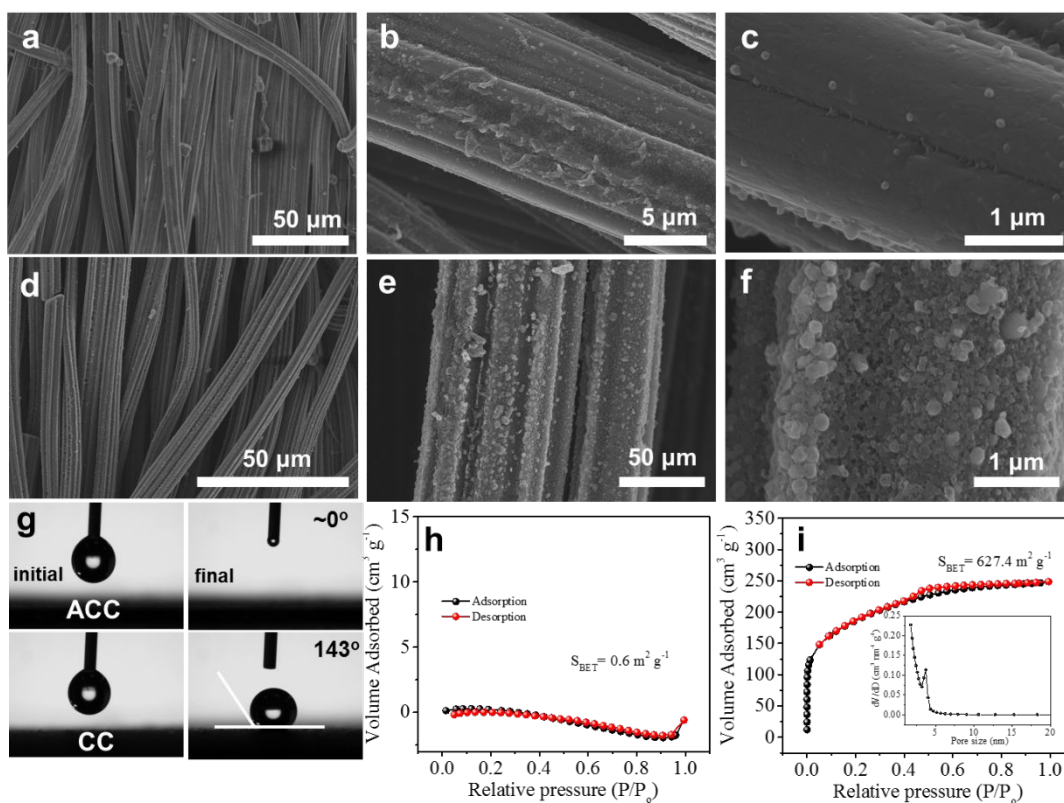

**Figure S1.** (a), (b), (c) FE-SEM images of the carbon cloth (CC); (d), (e), (f) FE-SEM images of the activated carbon cloth (ACC); (g) Contact angle test of CC and ACC; (h), (j) Nitrogen adsorption-desorption isotherms of CC and ACC, respectively.

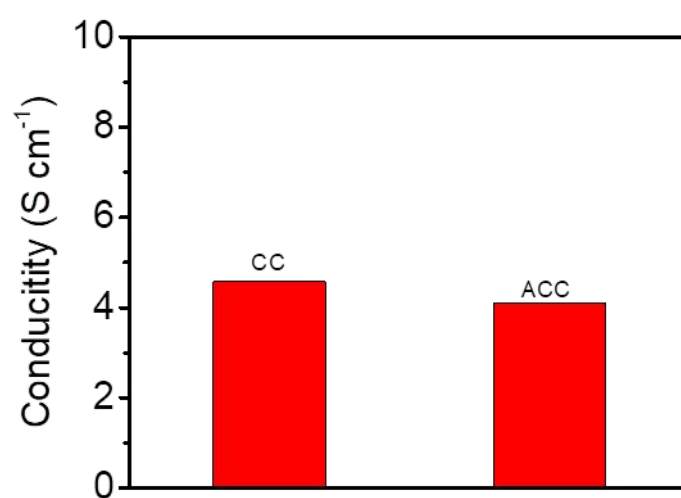

**Figure S2.** Conductivity of carbon cloth (CC) activated carbon cloth (ACC).

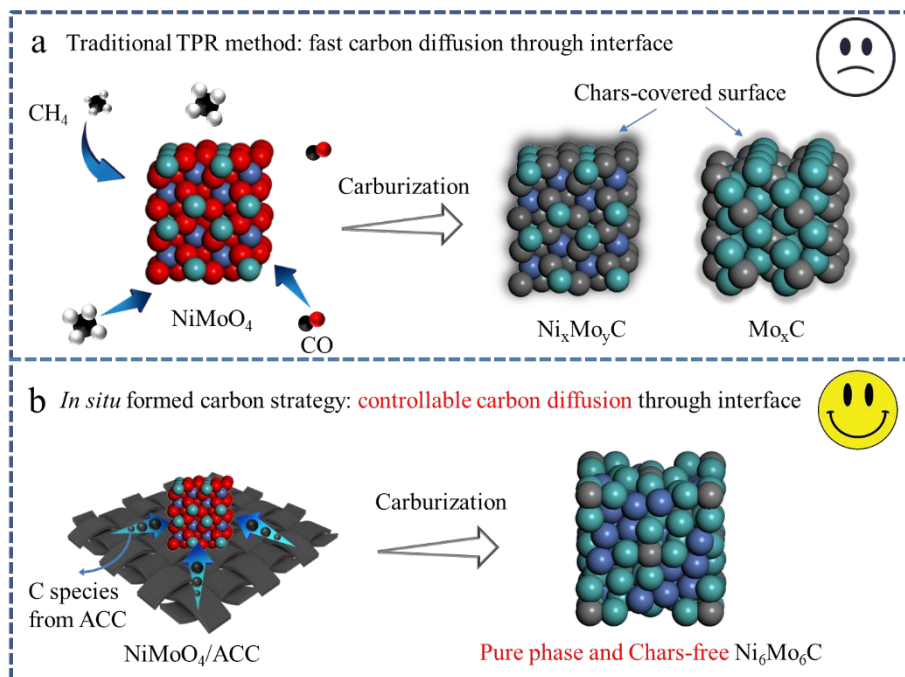

**Figure S3.** Schematic diagram of traditional TPR method (a) and *in situ* formed carbon strategy (b) for constructing metal carbides.

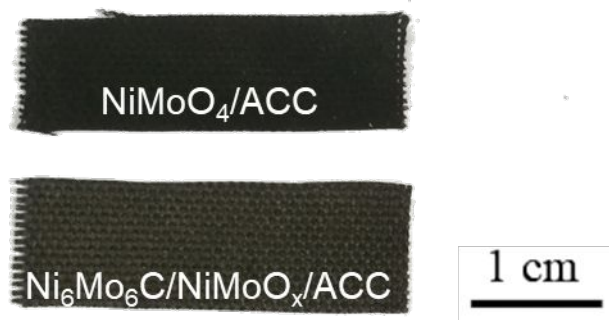

**Figure S4.** Digital photo of NiMoO<sub>4</sub>/ACC and Ni<sub>6</sub>Mo<sub>6</sub>C/NiMoO<sub>x</sub>/ACC.

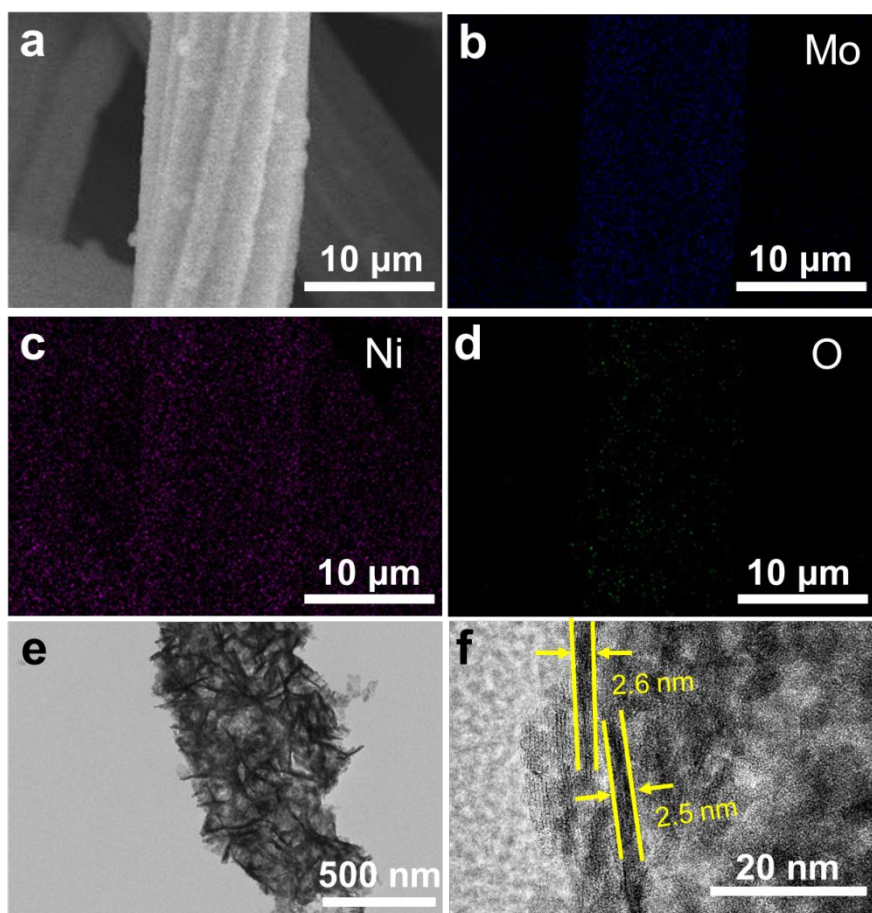

**Figure S5.** (a) SEM image, (b-d) corresponding elemental mapping images and TEM images (e) and HRTEM (f) of NiMoO<sub>4</sub>/ACC.

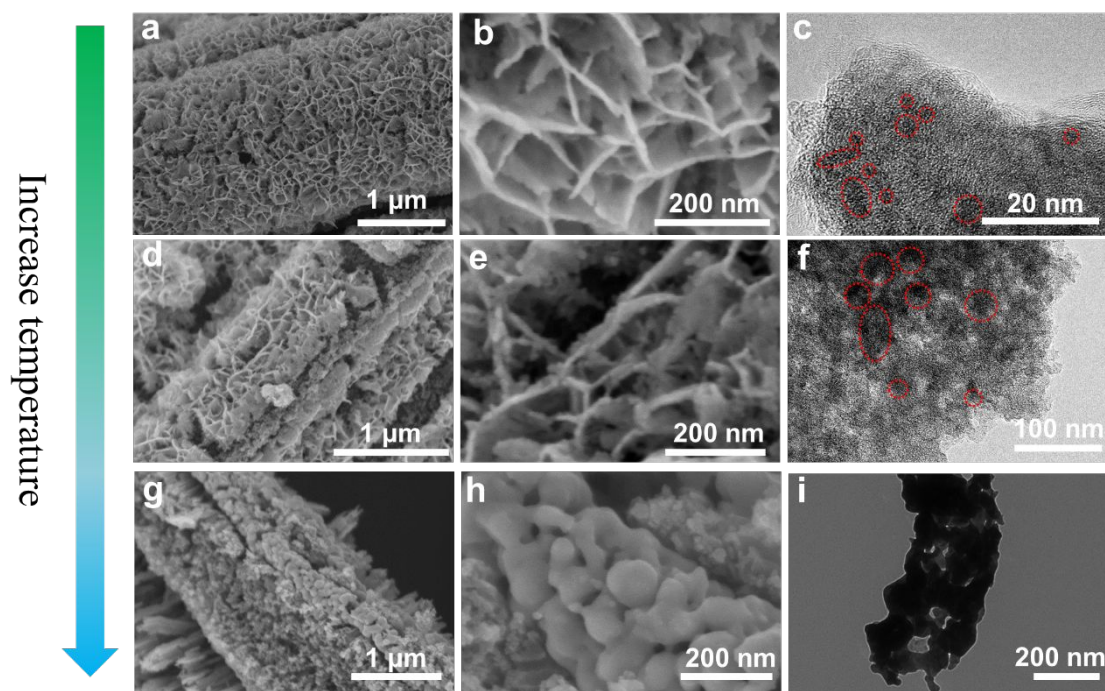

**Figure S6.** SEM images and TEM image of  $\text{Ni}_6\text{Mo}_6\text{C}/\text{NiMoO}_x\text{-300}$  (a, b, c),  $\text{Ni}_6\text{Mo}_6\text{C}/\text{NiMoO}_x\text{-500}$  (d, e, f) and  $\text{Ni}_6\text{Mo}_6\text{C}/\text{Mo}_2\text{C-600}$  (g, h, i).

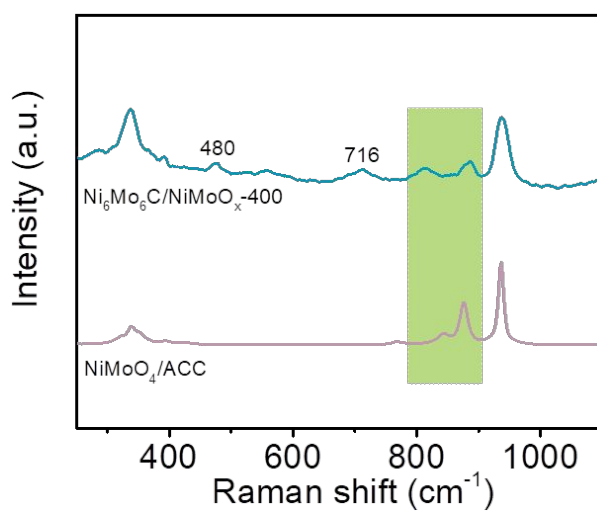

**Figure S7.** (a) EPR spectra and (b) Raman spectra of  $\text{NiMoO}_4/\text{ACC}$  and  $\text{Ni}_6\text{Mo}_6\text{C}/\text{NiMoO}_x\text{-400}$ .

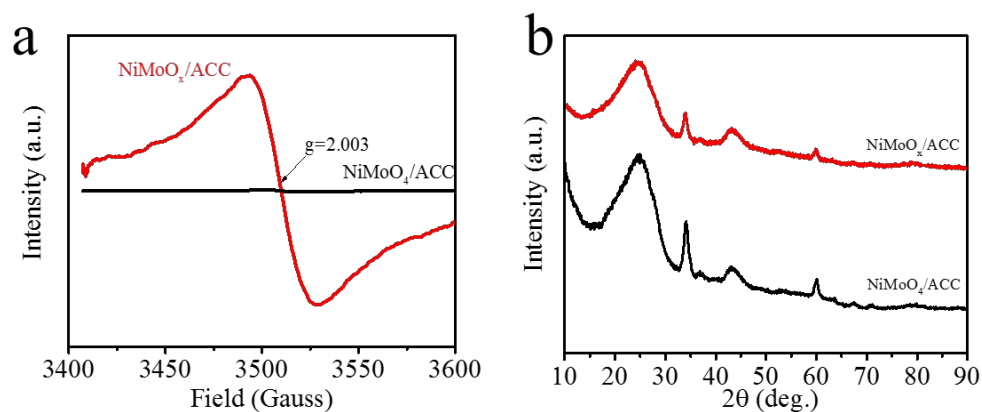

**Figure S8.** EPR spectra (a) and XRD patterns (b) of NiMoO<sub>4</sub>/ACC and NiMoO<sub>x</sub>/ACC.

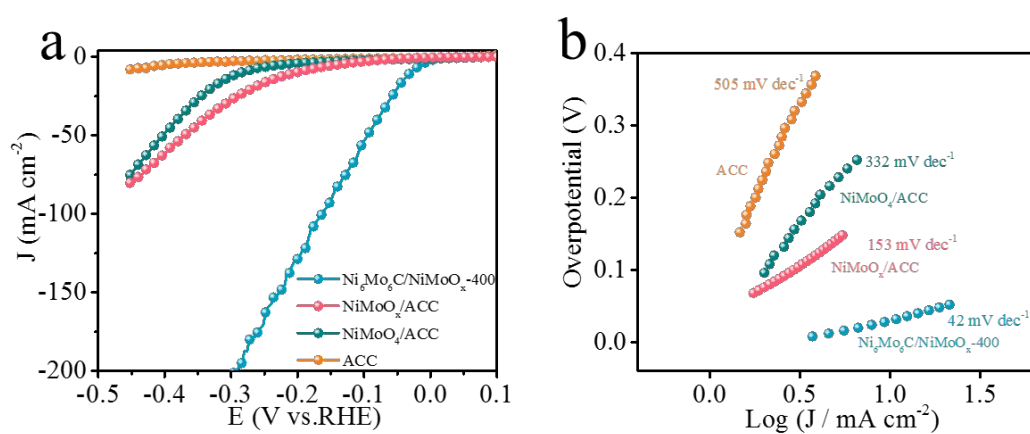

**Figure S9.** (a) HER polarization curves and (b) Tafel slope plots of Ni<sub>6</sub>Mo<sub>6</sub>C/NiMoO<sub>x</sub>-400, NiMoO<sub>x</sub>/ACC, NiMoO<sub>4</sub>/ACC precursor and carbon substrate ACC.

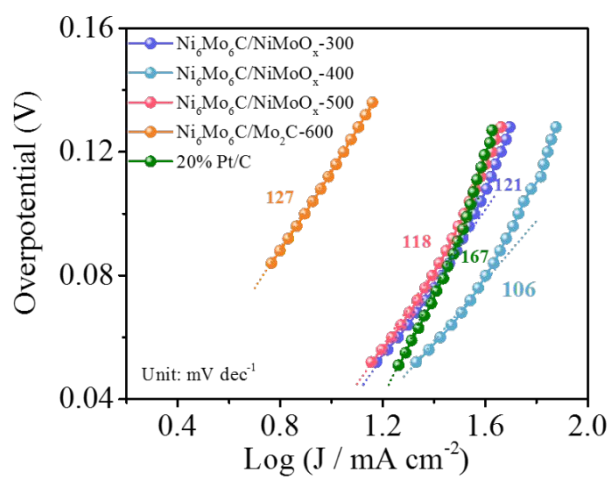

**Figure S10.** Tafel plots obtained from the polarization curves at a large overpotential range (>50 mV) in 1.0 M KOH electrolyte.

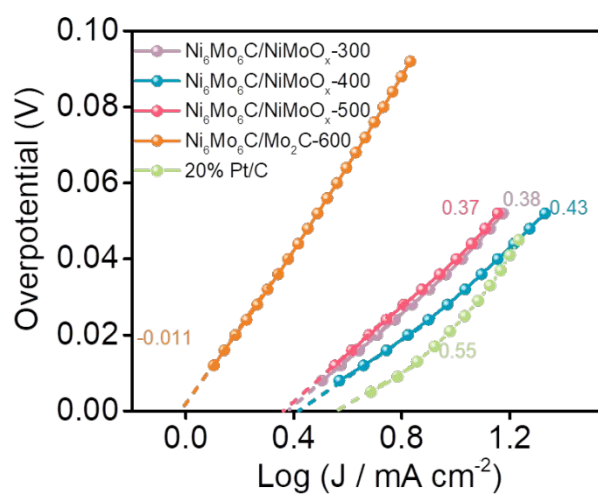

**Figure S11.** Exchange current density of various catalysts through extrapolation of Tafel plots in low overpotential region.



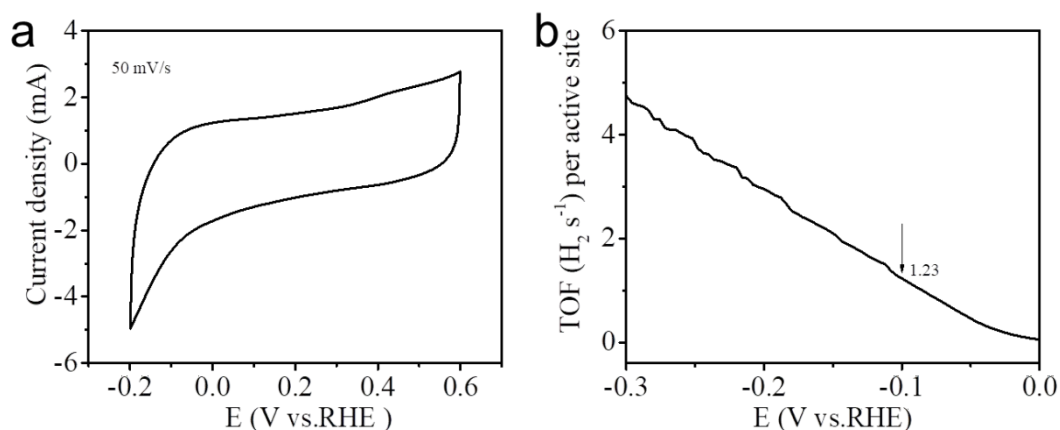

**Figure S12.** (a) CV of  $\text{Ni}_6\text{Mo}_6\text{C}/\text{NiMoO}_x\text{-400}$  in 1 M PBS (pH =7) with a scan rate of  $50 \text{ mV s}^{-1}$ . (b) The calculated turnover frequency curve of  $\text{Ni}_6\text{Mo}_6\text{C}/\text{NiMoO}_x\text{-400}$  catalyst for HER.

The TOF of  $\text{Ni}_6\text{Mo}_6\text{C}/\text{NiMoO}_x\text{-400}$  for HER was calculated based on an electrochemical CV method. Figure S9a shows CV curve in the region of -0.2 to 0.6 V vs. RHE for  $\text{Ni}_6\text{Mo}_6\text{C}/\text{NiMoO}_x\text{-400}$  in 1 M phosphate buffer solution (PBS, pH = 7). The integrated charge over the whole potential range should be proportional to the total number of active sites. Assuming a one-electron process for both reduction and oxidation process, the upper limit of active sites could be calculated. Figure S9b shows the polarization curves in 1 M KOH, normalized by the active sites and expressed in terms of TOF. The turnover frequency (TOF) value at overpotential of 100 mV is  $1.23 \text{ s}^{-1}$  in alkaline media, which is larger than those for reported  $\text{Mo}_2\text{C}$ -based materials and so on. (the TOF values of these catalysts at 100 mV usually below  $1.0 \text{ s}^{-1}$ )



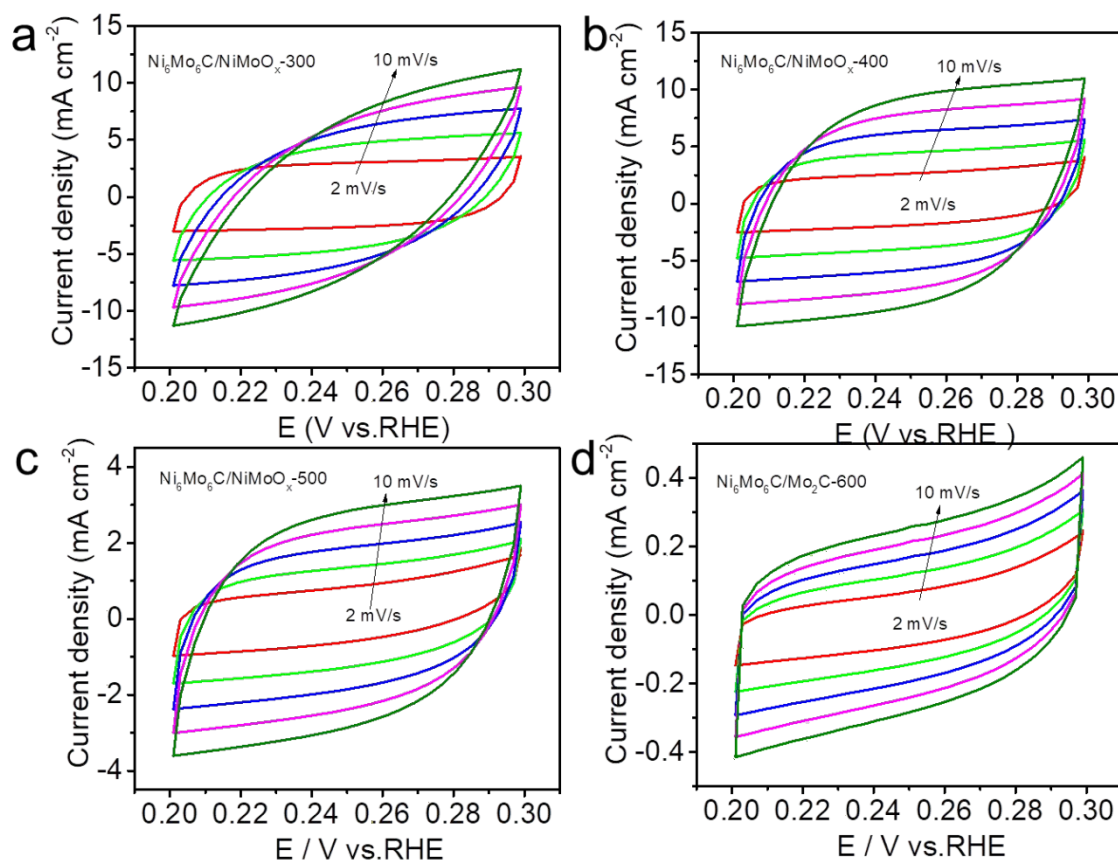

**Figure S13.** Cyclic voltammetry of (a-d)  $\text{Ni}_6\text{Mo}_6\text{C}/\text{NiMoO}_x\text{-T}$ , respectively, the arrows represent the increased scan rate from 2 mV/s to 10 mV/s.

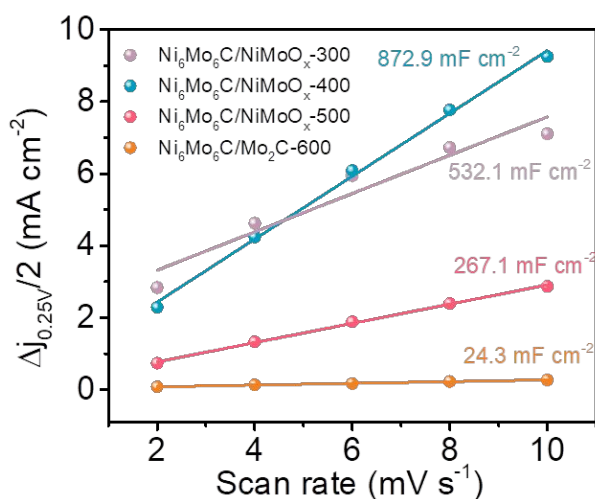

**Figure S14.** The capacitive currents at 0.25 V vs. RHE against scan rate fitted to a linear regression enables the estimation of  $C_{dl}$ , where the slope are  $C_{dl}$  of  $\text{Ni}_6\text{Mo}_6\text{C}/\text{NiMoO}_x\text{-T}$ .

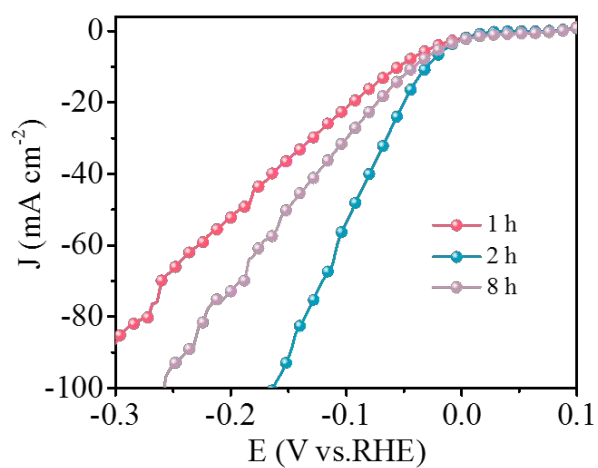

**Figure S15.** The HER polarization curves of  $\text{Ni}_6\text{Mo}_6\text{C}/\text{NiMoO}_x\text{-400}$  with different calcination time.

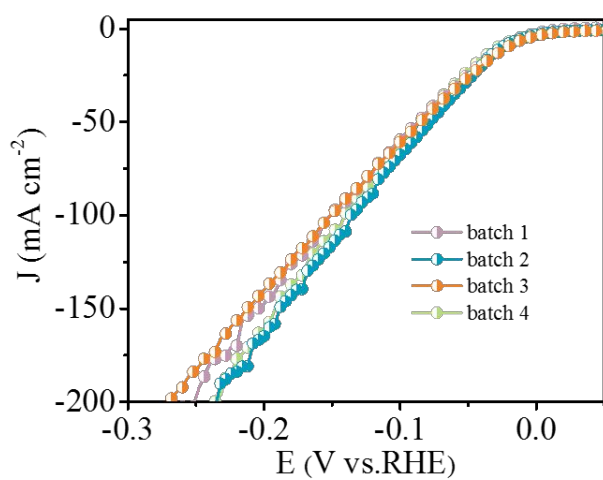

**Figure S16.** The polarization curves for different batches of  $\text{Ni}_6\text{Mo}_6\text{C}/\text{NiMoO}_x\text{-400}$  under the same electrochemical conditions; the data of batch 1 is presented in Figure 3a.

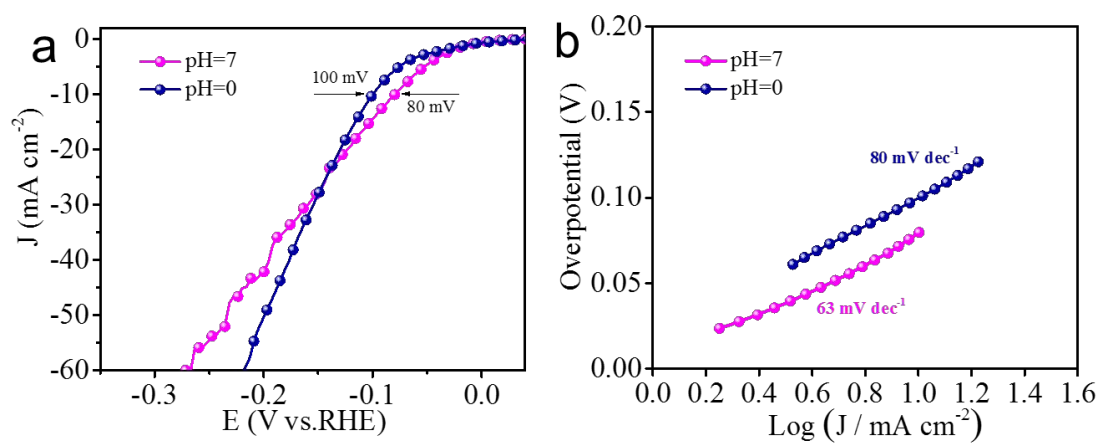

**Figure S17.** (a) Polarization curves for  $\text{Ni}_6\text{Mo}_6\text{C}/\text{NiMoO}_x\text{-400}$  in pH = 0 and pH = 7 media and (b) corresponding Tafel plot

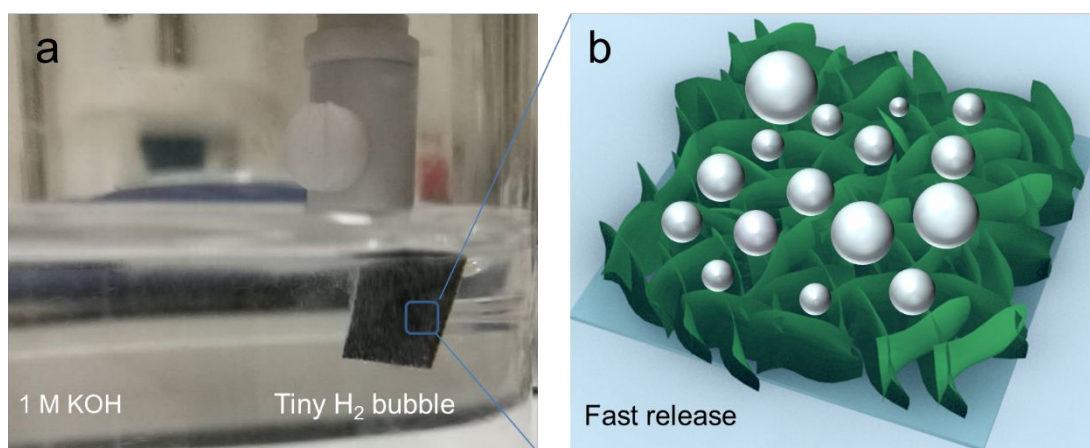

**Figure S18.** (a) Digital photo of catalyst under electrochemical test (-0.1 V vs. RHE) and (b) schematic illustration of the microstructure of catalyst during HER process.

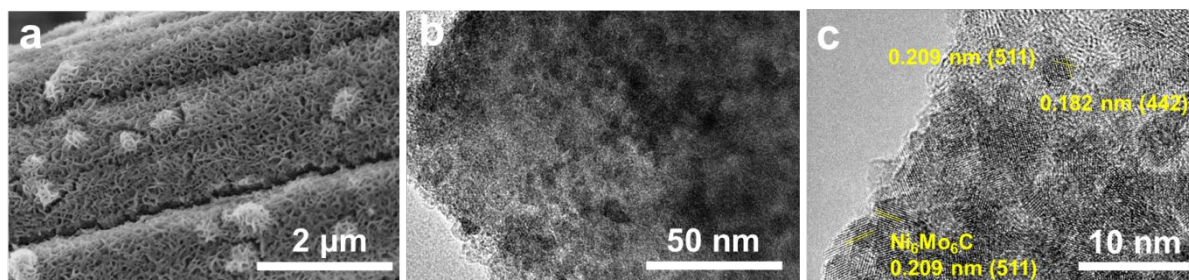

**Figure S19.** (a) FE-SEM images and (b), (c) HRTEM images of  $\text{Ni}_6\text{Mo}_6\text{C}/\text{NiMoO}_x\text{-400}$  after 60 h i-t test

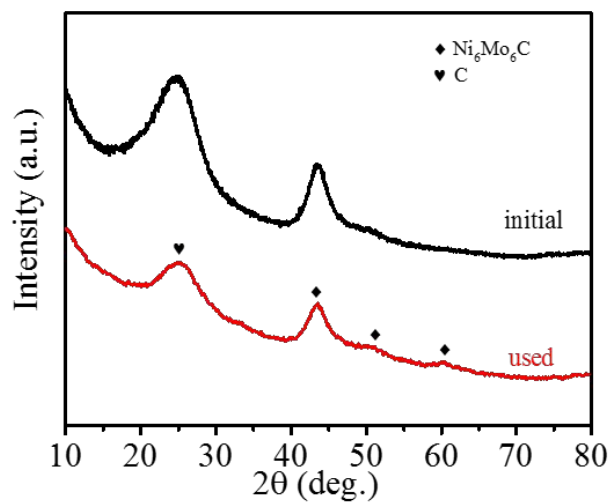

**Figure S20.** XRD patterns of initial  $\text{Ni}_6\text{Mo}_6\text{C}/\text{NiMoO}_x\text{-400}$  (black) and after i-t test for 60 h in 1 M KOH (red).

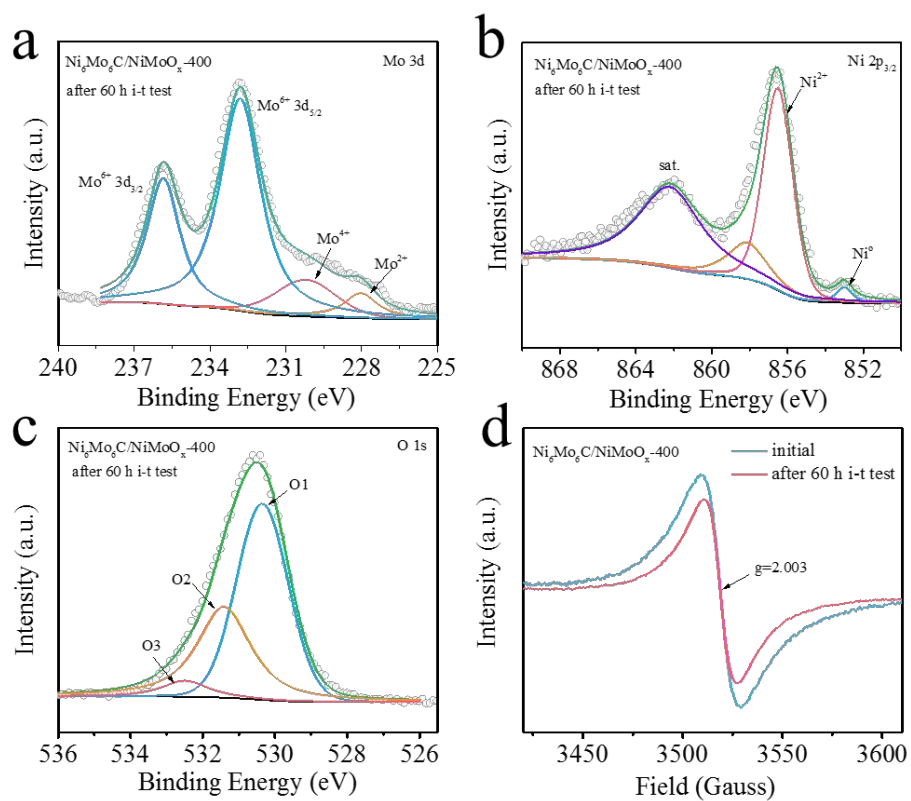

**Figure S21.** XPS and EPR spectra of  $\text{Ni}_6\text{Mo}_6\text{C}/\text{NiMoO}_x-400$  after long-term test.

High-resolution for the Mo 3d peak (a), Ni 2p<sub>3/2</sub> peak (b), O 1s peak (c) and EPR spectra (d).

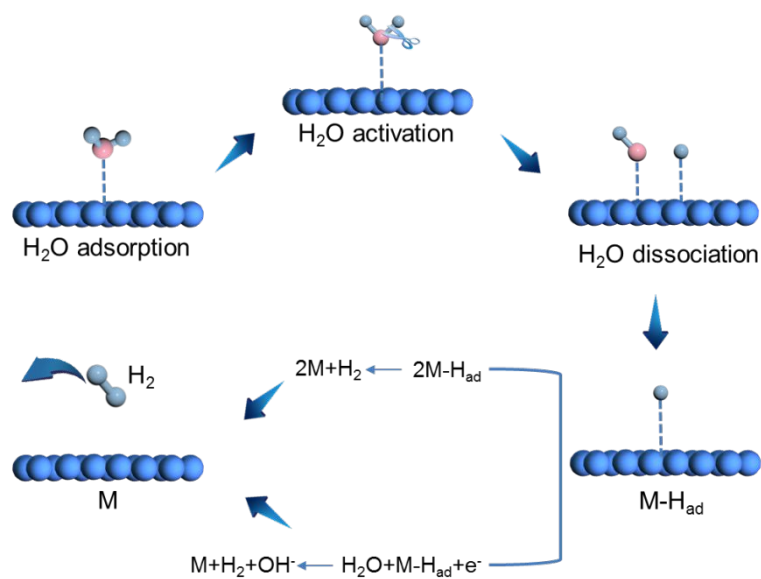

**Figure S22.** Mechanism of hydrogen evolution reaction under alkaline conditions.



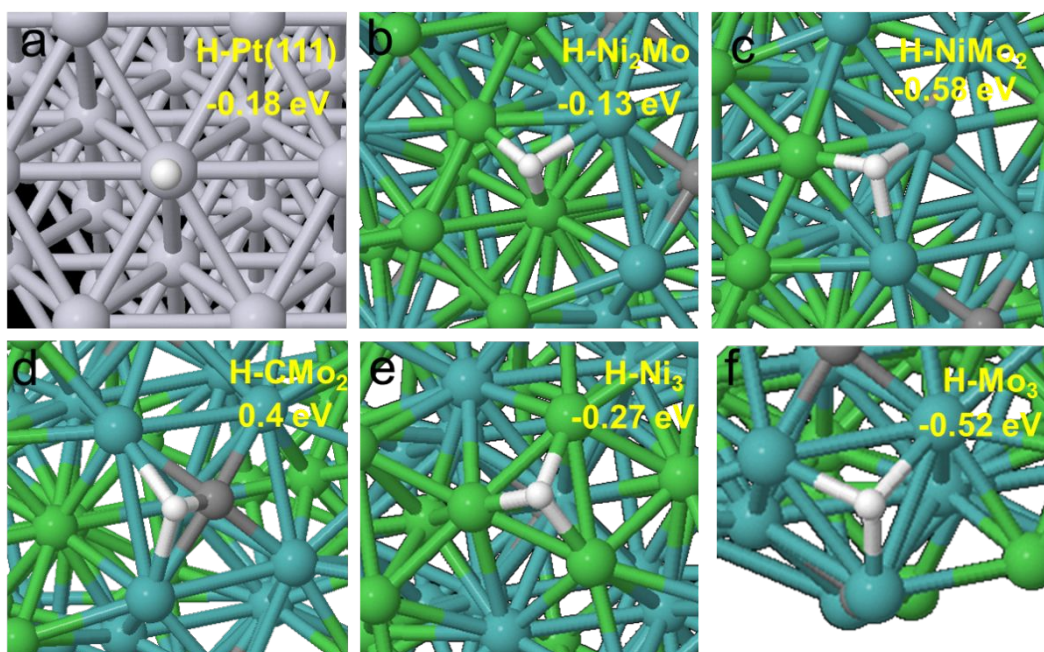

**Figure S23.** The stable configurations of H adsorption on various sites: (a) Pt (111); (b)  $\text{Ni}_2\text{Mo}$ , (c)  $\text{NiMo}_2$ , (d)  $\text{CMo}_2$ , (e)  $\text{Ni}_3$  and (f)  $\text{Mo}_3$  of  $\text{Ni}_6\text{Mo}_6\text{C}$  (511). (Ni: green, Mo: cyan, C: black, Pt: grey H: white).

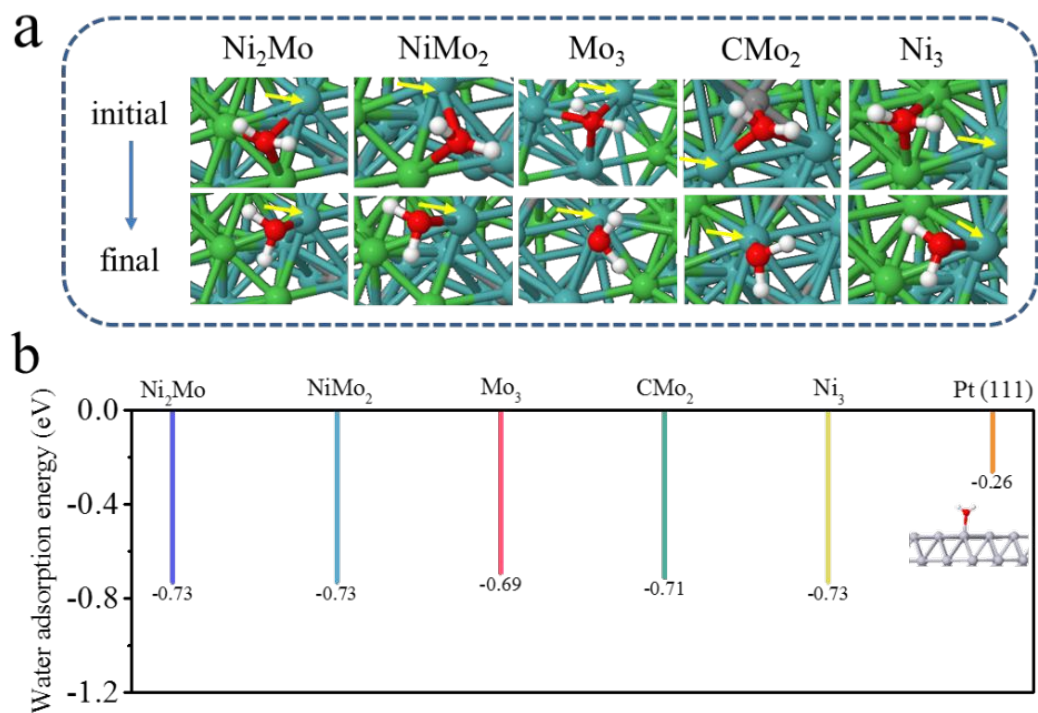

**Figure S24.** (a) The configurations of initial and final state for water adsorption on different sites of Ni<sub>6</sub>Mo<sub>6</sub>C (511); (b) Corresponding calculated water adsorption energy of different sites on Ni<sub>6</sub>Mo<sub>6</sub>C (511) and Pt (111).

**Table S1.** Comparison of the HER performance for Ni<sub>6</sub>Mo<sub>6</sub>C/NiMoO<sub>x</sub>/ACC with other recent transition metal carbides-based catalyst.

| Catalysts                                                 | $\eta$ (mV) - $j$ (mA cm <sup>-2</sup> )                                | Electrolyte | IR compensation | References |
|-----------------------------------------------------------|-------------------------------------------------------------------------|-------------|-----------------|------------|
|                                                           | Tafer slope (mV dec <sup>-1</sup> )<br>at lower overpotential<br>regime |             |                 |            |
| Ni <sub>6</sub> Mo <sub>6</sub> C/NiMoO <sub>x</sub> /ACC | 29-10                                                                   | 1 M KOH     | ×               | This work  |
|                                                           | 42                                                                      |             |                 |            |
| Mo <sub>2</sub> C nanoparticles                           | 176-10                                                                  | 1 M KOH     | ×               | 1          |
|                                                           | 58                                                                      |             |                 |            |
| Mo <sub>2</sub> C/G-NCS                                   | 70-10                                                                   | 1 M KOH     | -               | 2          |
|                                                           | 39                                                                      |             |                 |            |
| Mo <sub>2</sub> C/2D-NPC                                  | 45-10                                                                   | 1 M KOH     | √               | 3          |
|                                                           | 46                                                                      |             |                 |            |
| Mo <sub>x</sub> C@3D N-doped C                            | 122-10                                                                  | 1 M KOH     | -               | 4          |
|                                                           | 78                                                                      |             |                 |            |
| Mo <sub>2</sub> S/Mo <sub>2</sub> C                       | 220-1000                                                                | 1 M KOH     | √               | 5          |
|                                                           | 43                                                                      |             |                 |            |
| Co-Mo <sub>2</sub> C nanowires                            | 118-10                                                                  | 1 M KOH     | √               | 6          |
|                                                           | 44                                                                      |             |                 |            |
| Mo <sub>x</sub> Co <sub>x</sub> C@C                       | 83-10                                                                   | 1 M KOH     | √               | 7          |
|                                                           | 50                                                                      |             |                 |            |
| MoP/Mo <sub>2</sub> C@C                                   | 75-10                                                                   | 1 M KOH     | √               | 8          |
|                                                           | 58                                                                      |             |                 |            |



|                                       |         |         |   |    |
|---------------------------------------|---------|---------|---|----|
| CoMoC                                 | 46-10   | 1 M KOH | - | 9  |
|                                       | 46      |         |   |    |
| Ni <sub>3</sub> Mo <sub>3</sub> C/NPC | 215-100 | 1 M KOH | √ | 10 |
| NWS@CC                                | 106     |         |   |    |
| Co-NC@Mo <sub>2</sub> C               | 99-10   | 1 M KOH | √ | 11 |
|                                       | 60      |         |   |    |

Table S2. The surface content of Ni and Mo element of Ni<sub>6</sub>Mo<sub>6</sub>C/NiMoO<sub>x</sub>-400 before and after long-term test.

| Element \ Catalyst | Initial | After long-term test |
|--------------------|---------|----------------------|
| Ni (at %)          | 6.2     | 6.1                  |
| Mo (at %)          | 3.6     | 3.3                  |

## References

1. Ma, L.; Ting, L. R. L.; Molinari, V.; Giordano, C.; Yeo, B. S. Efficient hydrogen evolution reaction catalyzed by molybdenum carbide and molybdenum nitride nanocatalysts synthesized via the urea glass route. *J. Mater. Chem. A* **2015**, 3, 8361-8368.
2. Wei, H.; Xi, Q.; Chen, X.; Guo, D.; Ding, F.; Yang, Z.; Wang, S.; Li, J.; Huang, S.; Graphene Nanoarchitectonics: Recent Advances in Graphene-Based Electrocatalysts for Hydrogen Evolution Reaction. *Adv. Sci.* **2018**, 5, 1700733.

3. Lu, C.; Tranca, D.; Zhang, J.; Rodriguez Hernandez, F. N.; Su, Y.; Zhuang, X.; Zhang, F.; Seifert, G.; Feng, X. Molybdenum carbide-embedded nitrogen-doped porous carbon nanosheets as electrocatalysts for water splitting in alkaline media. *ACS nano*, **2017**, *11*, 3933-3942.
4. Zhang, H.; Ma, Z.; Liu, G.; Shi, L.; Tang, J.; Pang, H.; Wu, K.; Takei, T.; Zhang, J.; Yamauchi, Y.; Ye, J. Highly active nonprecious metal hydrogen evolution electrocatalyst: ultrafine molybdenum carbide nanoparticles embedded into a 3D nitrogen-implanted carbon matrix. *NPG Asia Mater.* **2016**, *8*, e293.
5. Luo, Y.; Tang, L.; Khan, U.; Yu, Q.; Cheng, H. M.; Zou, X.; Liu, B. Morphology and surface chemistry engineering toward pH-universal catalysts for hydrogen evolution at high current density. *Nat. Commun.* **2019**, *10*, 1-9.
6. Lin, H.; Liu, N.; Shi, Z.; Guo, Y.; Tang, Y.; Gao, Q. Cobalt-Doping in Molybdenum-Carbide Nanowires Toward Efficient Electrocatalytic Hydrogen Evolution. *Adv. Funct. Mater.* **2016**, *26*, 5590-5598.
7. Chen, C.; Wu, A.; Yan, H.; Xiao, Y.; Tian, C.; Fu, H. Trapping  $[\text{PMo}_{12}\text{O}_{40}]^{3-}$  clusters into pre-synthesized ZIF-67 toward  $\text{Mo}_x\text{Co}_xC$  particles confined in uniform carbon polyhedrons for efficient overall water splitting. *Chem. Sci.* **2018**, *9*, 4746-4755.
8. Zhang, L.; Li, S.; Tan, H.; Khan, S.; Ma, Y.; Zang, H.; Wang, Y.; Li, Y. MoP/Mo<sub>2</sub>C@C: a new combination of electrocatalysts for highly efficient hydrogen evolution over the entire pH range. *ACS Appl. Mater. Interfaces* **2017**, *9*, 16270-16279.

9. Liu, G.; Bai, H.; Ji, Y.; Wang, L.; Wen, Y.; Lin, H.; Zheng, L.; Li, Y.; Zhang, B.; Peng, H. A highly efficient alkaline HER Co-Mo bimetallic carbide catalyst with an optimized Mo d-orbital electronic state. *J. Mater. Chem. A* **2019**, *7*, 12434-12439.
10. Guo, L.; Wang, J.; Teng, X.; Liu, Y.; He, X.; Chen, Z. A Novel Bimetallic Nickel-Molybdenum Carbide Nanowire Array for Efficient Hydrogen Evolution. *ChemSusChem*, **2018**, *11*, 2717-2723.
11. Liang, Q.; Jin, H.; Wang, Z.; Xiong, Y.; Yuan, S.; Zeng, X.; He, D.; Mu, S. Metal-organic frameworks derived reverse-encapsulation Co-NC@Mo<sub>2</sub>C complex for efficient overall water splitting. *Nano Energy*, **2019**, *57*, 746-752.
